# Supplementary material
Source: PubMed Central journal article supplement (PMC4604657)
Supplement: NIHMS65369-supplement-1.pdf [file NIHMS65369-supplement-1.pdf]

## SUPPLEMENTARY MATERIAL

Figure 1 shows a pictorial representation of the normal modes of vibration of nicotine in the *trans*-A conformation mentioned throughout the paper. Table 1 reports the optimized geometries of (S)-nicotine in the *trans*-A and *trans*-B conformations.

The conformer-specific VCD spectra are reported in figure 2. The spectra have been obtained by convoluting the calculated VCD intensities with non-normalized Gaussian functions with half-width at half-maximum arbitrarily chosen to be  $10\text{ cm}^{-1}$ . Figure 2a shows the harmonic spectra, figure 2b the anharmonic spectra, and figure 2c shows the  $4000\text{-}6500\text{ cm}^{-1}$  zone of the anharmonic spectra.

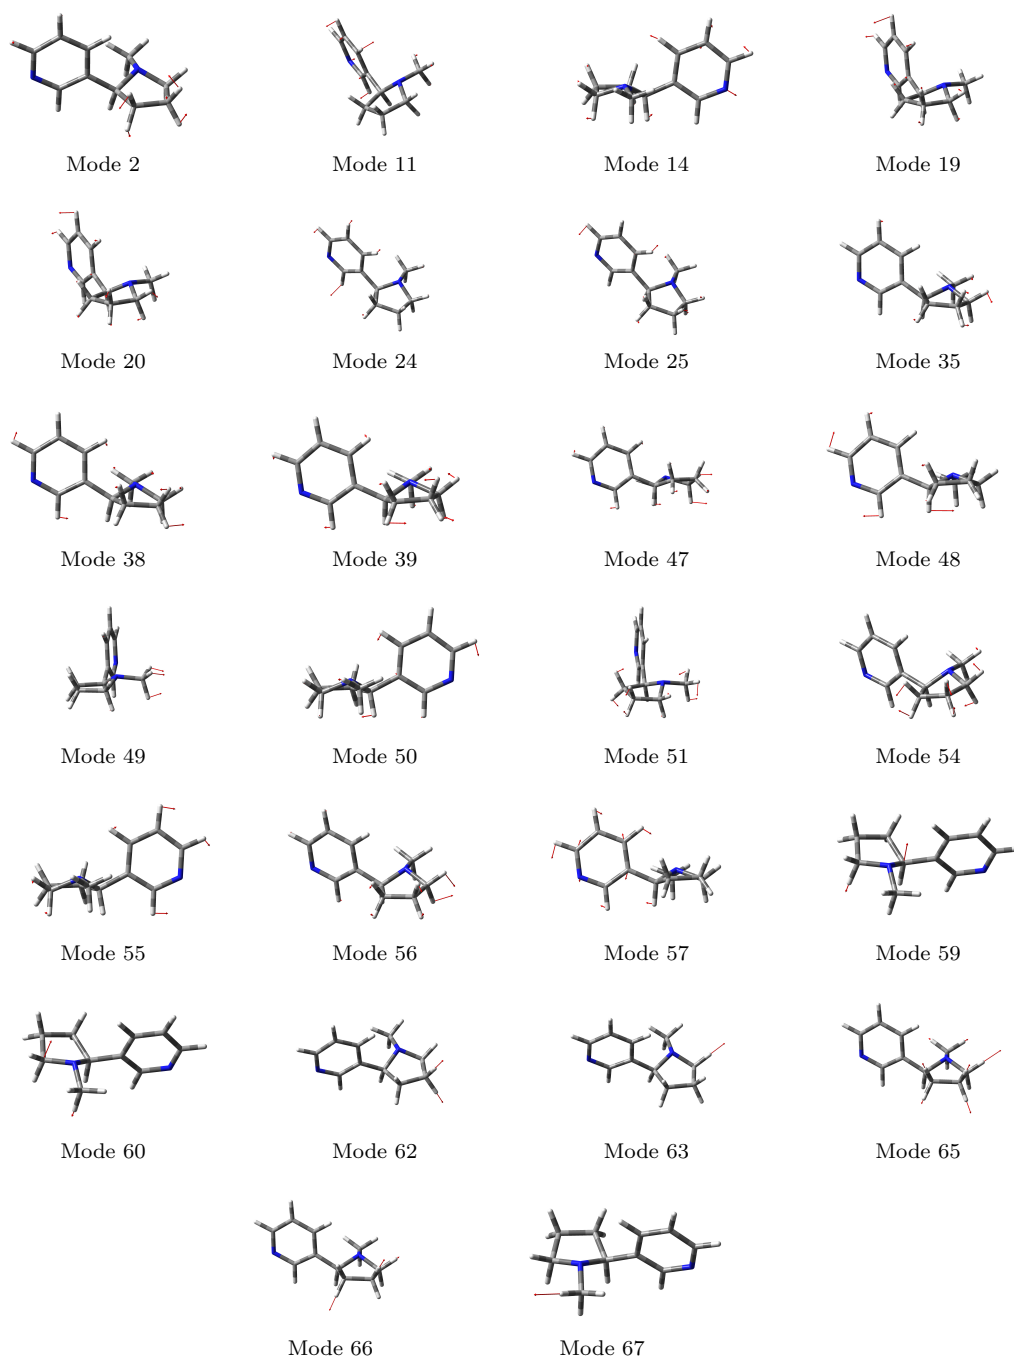

**Figure 1:** Normal modes of nicotine.

| Atom | <i>trans-A</i> |           |           | <i>trans-B</i> |           |           |
|------|----------------|-----------|-----------|----------------|-----------|-----------|
|      | <i>x</i>       | <i>y</i>  | <i>z</i>  | <i>x</i>       | <i>y</i>  | <i>z</i>  |
| H    | 3.591655       | -1.757083 | -0.335913 | -3.594438      | -1.781862 | 0.239299  |
| H    | 3.071343       | -1.504433 | 1.330490  | -3.003665      | -1.470410 | -1.394083 |
| H    | 3.343318       | 0.527718  | -0.913351 | -3.353485      | 0.487001  | 0.910332  |
| H    | 3.605631       | 0.788783  | 0.824762  | -3.594630      | 0.795517  | -0.823716 |
| H    | 2.025697       | 2.799260  | 0.392802  | -0.902529      | -0.103406 | 1.601195  |
| H    | 0.897383       | -0.086589 | -1.582551 | -1.351578      | -2.303175 | 0.909637  |
| H    | 1.325041       | -2.304674 | -0.898968 | -0.834802      | -2.015986 | -0.750905 |
| H    | 0.866244       | -1.999611 | 0.775876  | -2.029749      | 2.802890  | -0.331943 |
| H    | -0.514906      | 0.073868  | 1.942318  | -0.356874      | 2.444812  | 0.132262  |
| H    | -1.323051      | -0.282625 | -2.258991 | -1.671121      | 2.240530  | 1.322896  |
| H    | -4.514687      | 0.006935  | 0.343410  | 4.448067       | 0.049425  | -0.673667 |
| H    | -2.995728      | 0.161948  | 2.316365  | 1.341982       | -0.362056 | 2.277695  |
| H    | 0.346979       | 2.443282  | -0.052826 | 0.505215       | 0.152536  | -1.902108 |
| H    | 1.643359       | 2.270078  | -1.267240 | 3.781516       | -0.259776 | 1.711336  |
| C    | 2.864695       | -1.232017 | 0.290953  | -2.844433      | -1.232720 | -0.337821 |
| C    | 2.954491       | 0.290912  | 0.097658  | -2.949675      | 0.281962  | -0.102102 |
| C    | 0.761423       | -0.225462 | -0.490116 | -0.761398      | -0.230512 | 0.507626  |
| C    | 1.398382       | -1.579369 | -0.083068 | -1.392648      | -1.584448 | 0.085553  |
| C    | 1.386816       | 2.134036  | -0.197906 | -1.397402      | 2.128124  | 0.254777  |
| C    | -0.718822      | -0.126598 | -0.194785 | 0.722127       | -0.127078 | 0.224938  |
| C    | -3.434067      | -0.028488 | 0.212656  | 3.396705       | -0.003317 | -0.394931 |
| C    | -1.208871      | 0.004192  | 1.108597  | 1.666781       | -0.235789 | 1.246518  |
| C    | -1.661230      | -0.192584 | -1.226147 | 1.208810       | 0.048654  | -1.078207 |
| C    | -2.583558      | 0.056444  | 1.316538  | 3.024555       | -0.177594 | 0.936318  |
| N    | 1.572706       | 0.759013  | 0.242681  | -1.569722      | 0.761721  | -0.216212 |
| N    | -2.990394      | -0.150906 | -1.045892 | 2.509088       | 0.112603  | -1.395822 |

**Table 1:** B3LYP/aug-N07D optimized geometry of nicotine in chloroform in the *trans-A* and *trans-B* conformations. The cartesian coordinates for each atom are given in Ångstroms.

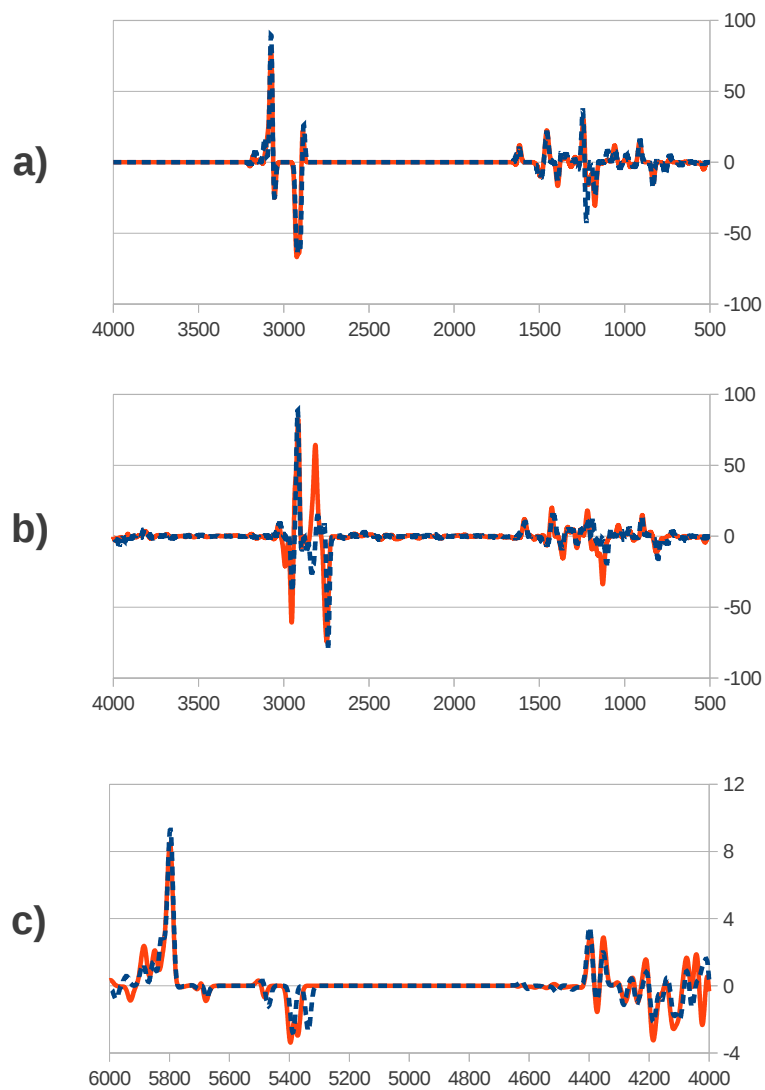

**Figure 2:** Calculated VCD spectra of for the two conformers of (S)-nicotine considered in the paper: the *trans*-A conformation (continuous orange line) and the *trans*-B conformation (dashed blue line). a) Harmonic spectrum. b) Anharmonic spectrum. c) Anharmonic spectrum, overtones region. Wavenumbers are reported in  $\text{cm}^{-1}$  and intensities in arbitrary units.
